# Supplementary material
Source: HighWire-hosted journal article supplement (https://ebmtp.com/highwire/filestream/136133/field_highwire_adjunct_files/0/mawet_85_1945.pdf)
Supplement: mawet_85_1945.pdf [file mawet_85_1945.pdf]

# 偏头痛患者对急性缺血性脑损伤的敏感性

## 回顾性病例对照研究

Jerome Mawet, MD;Katharina Eikermann-Haerter, MD;Kwang-Yeol Park, MD;Johanna Helenius, MD;  
Ali Daneshmand, MD;Lea Pearlman Ross Avery Andrea Negro, MD;Murat Velioglu, MD;  
Ethem Murat Arsava, MD;Hakan Ay, MD;Cenk Ayata, MD

**目的：**偏头痛，尤其是先兆性偏头痛，是缺血性卒中的危险因素之一。近期在偏头痛突变小鼠的研究显示偏头痛大脑过度兴奋会加速缺血半暗带向核心区域变化，导致梗塞面积大于野生型小鼠。我们假设有偏头痛病史的个体在急性卒中病程中缺血组织向梗死发展得更快。

**方法：**在本项回顾性病例对照研究中，我们甄别出有可靠记录偏头痛病史的受试者，在症状发作后 72 小时内采用弥散加权灌注加权 MRI 测定病灶体积，计算缺血性组织在灌注加权成像(perfusion-weighted imaging, PWI)与高信号在弥散加权成像(diffusion-weighted imaging, DWI)的比例，并比较 DWI 病灶 > 83% PWI 病灶的患者的比例。

**结果：**偏头痛患者(n = 45)相较于对照组更年轻、多为女性、有血管危险因素的可能性更小且颈动脉夹层常见，但其他因素与对照组(n = 27)无差别。偏头痛患者的 DWI 病灶 > 83% PWI 病灶的人数更多，提示在行 MRI 检查时整个低灌注区已变成梗死区（偏头痛患者和对照组中分别为 22% vs 4%， $p = 0.044$ ）。在先兆偏头痛患者中该差别更明显（36% vs 4%， $p = 0.019$ ）。偏头痛和 DWI 病灶 > 83% PWI 病灶间的相关性在校正至行 MRI 时间后持续存在( $p = 0.041$ )。

**结论：**该病例对照研究证实了有偏头痛病史的患者（尤其是先兆偏头痛患者）与急性缺血性卒中中去不匹配模式相关的假说，与在偏头痛突变小鼠中获得的数据一致。 *Neurology*® 2015;85:1945–1949
